# Supplementary material for: S100A8/A9 promotes endometrial fibrosis via regulating RAGE/JAK2/STAT3 signaling pathway
Source: PubMed Central journal article supplement (PMC10803310; doi:10.1038/s42003-024-05814-5), 2024-01-22
Supplement: 42003_2024_5814_MOESM1_ESM.pdf [file 42003_2024_5814_MOESM1_ESM.pdf]

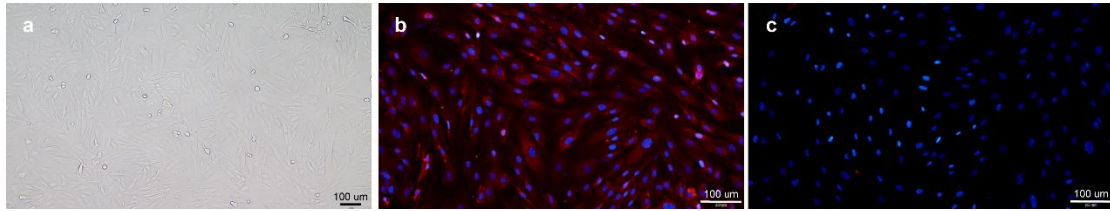

**Supplementary Fig. 1 Representative optical microscope images and immunofluorescent staining of P3 hEnSCs.** **a** Representative optical microscope images of P3 hEnSCs. **b** Immunofluorescence image of Vimentin staining (blue: DAPI, red: Vimentin). **c** Immunofluorescence image of  $\alpha$ -SMA staining (blue: DAPI, red:  $\alpha$ -SMA). Scale bar = 100  $\mu$ m.

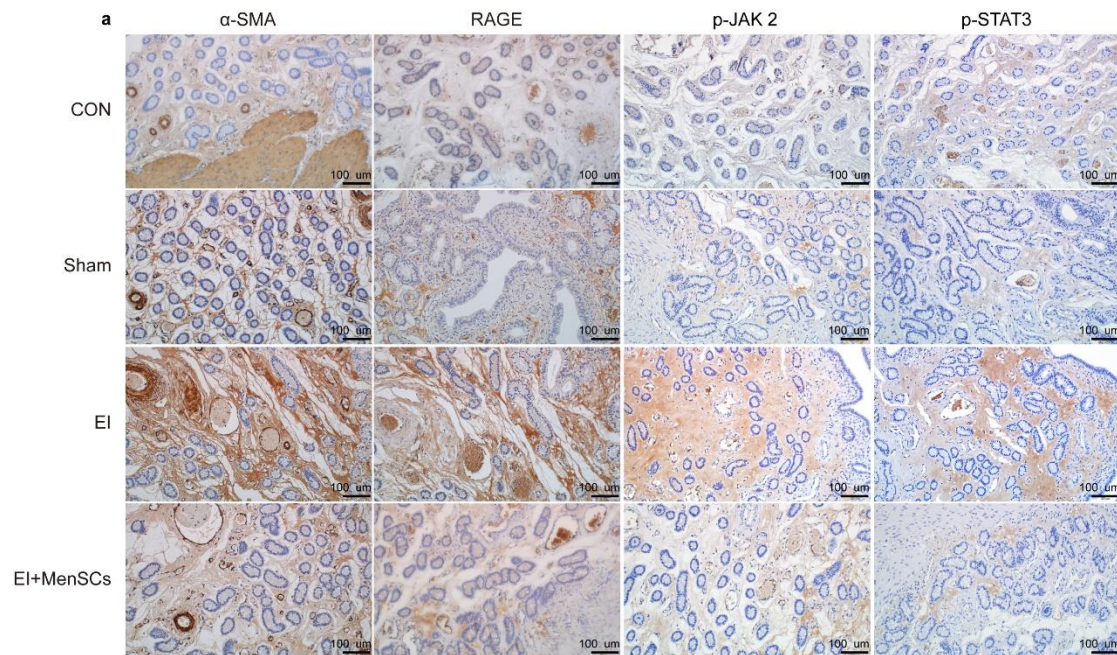

**Supplementary Fig. 2 Representative immunohistochemistry images of  $\alpha$ -SMA, RAGE, p-JAK2, and p-STAT3 in porcine endometrial tissue sections from CON, Sham, EI and EI+MenSCs groups are shown.** Scale bar = 100  $\mu$ m.

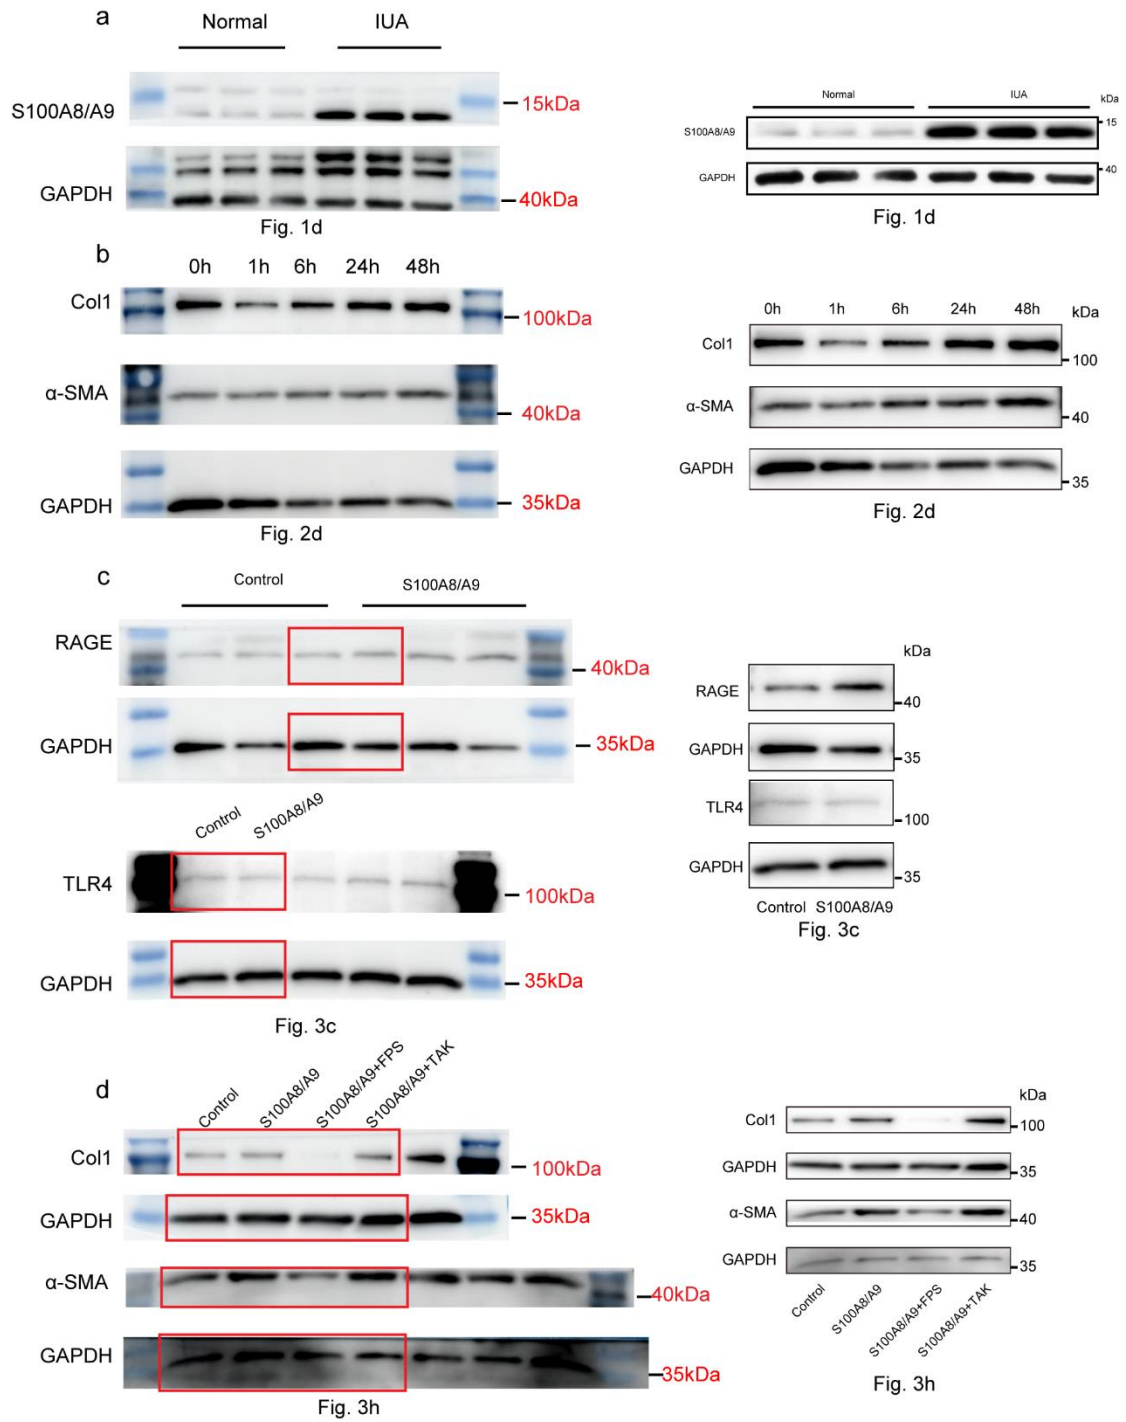

**Supplementary Fig. 3 Uncropped scans of Western blot results.**

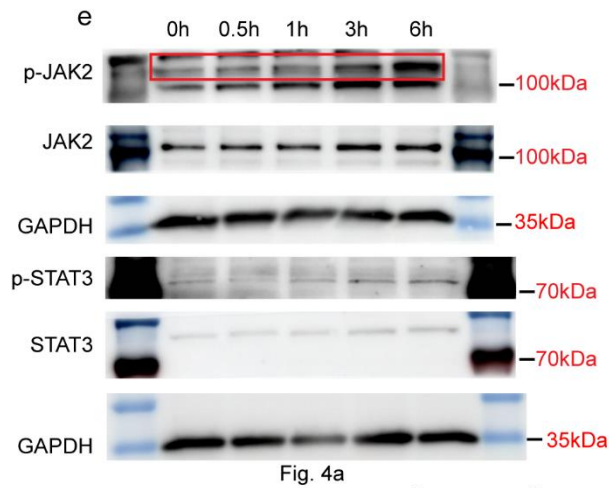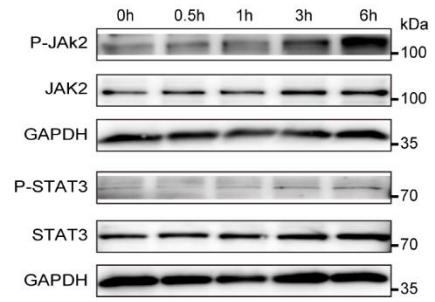

Fig. 4a

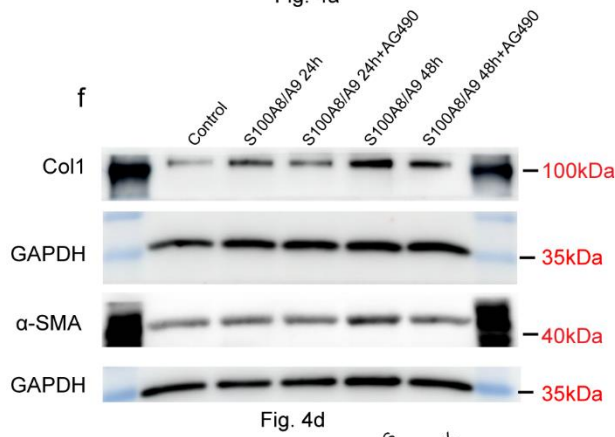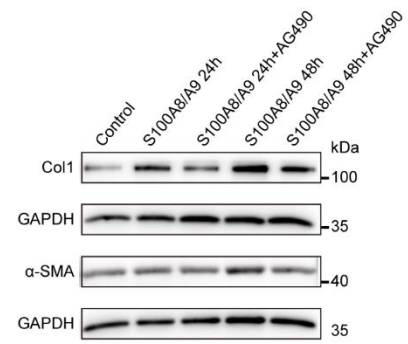

Fig. 4d

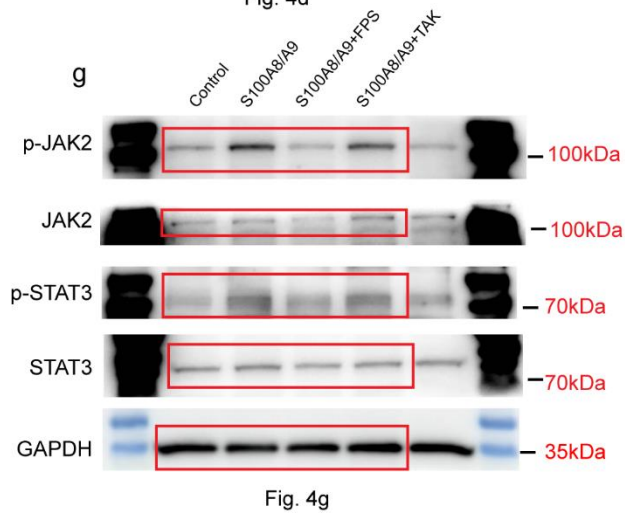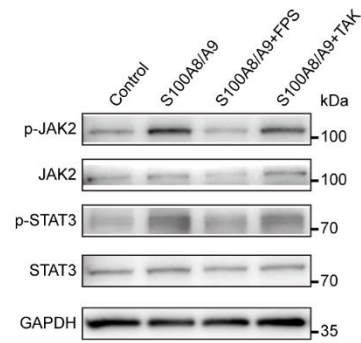

Fig. 4g

**Supplementary Fig. 3 Uncropped scans of Western blot results.**
